# Supplementary material
Source: PubMed Central journal article supplement (PMC6697165)

# Figure S2

## A

PDAC Cell Lines Classification

Classical  
QM

PDAC Subtypes

E-L  
Q-M  
Classical

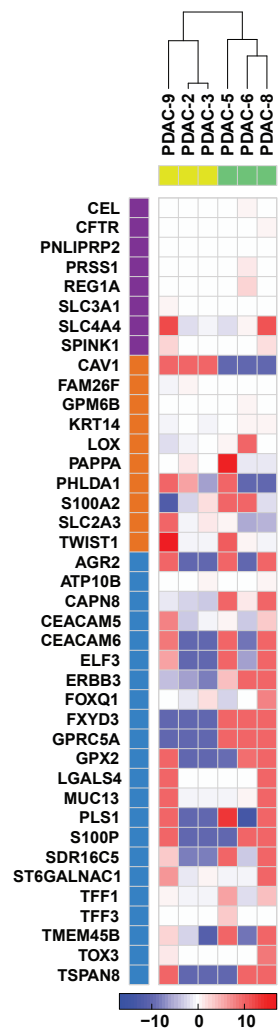

## B

PDACs + CAF-2

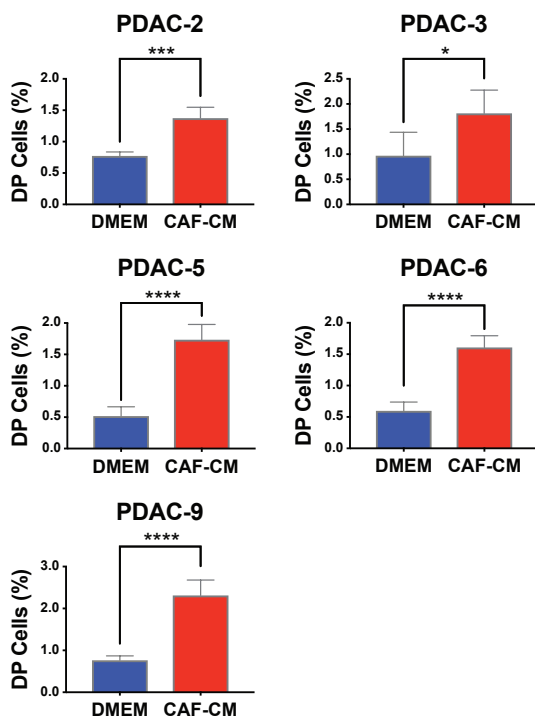

PDACs + CAF-3

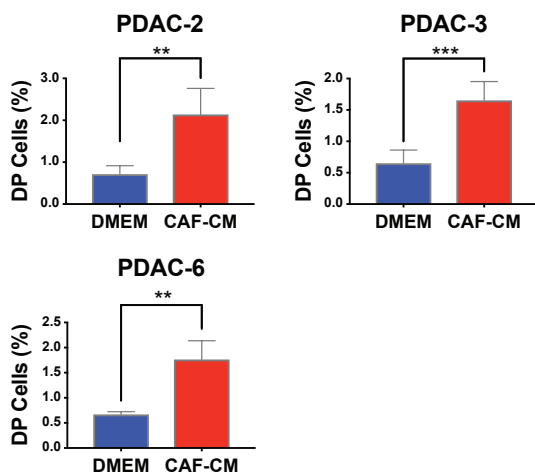

## C

PDACs:CAF-2

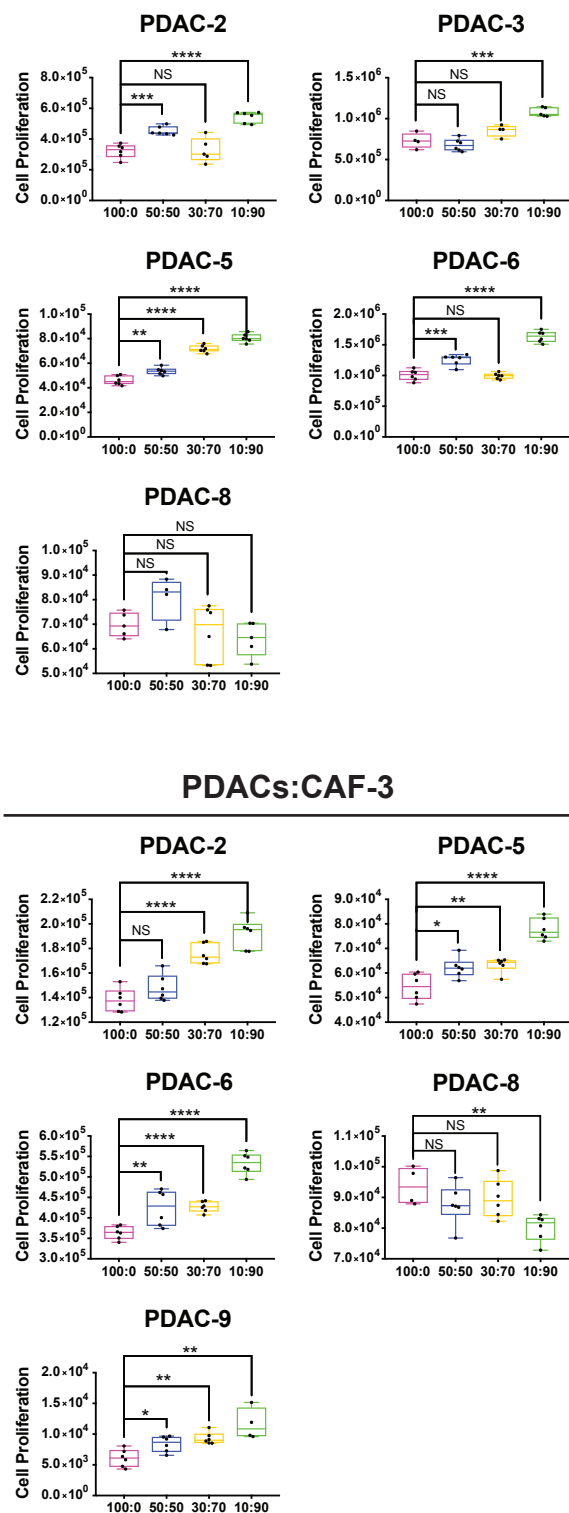

PDACs:CAF-3

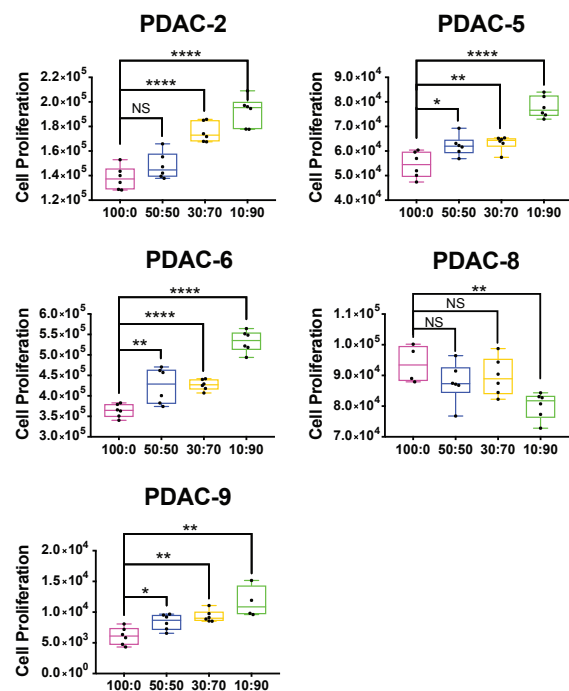

## D

PDACs + CAF-1

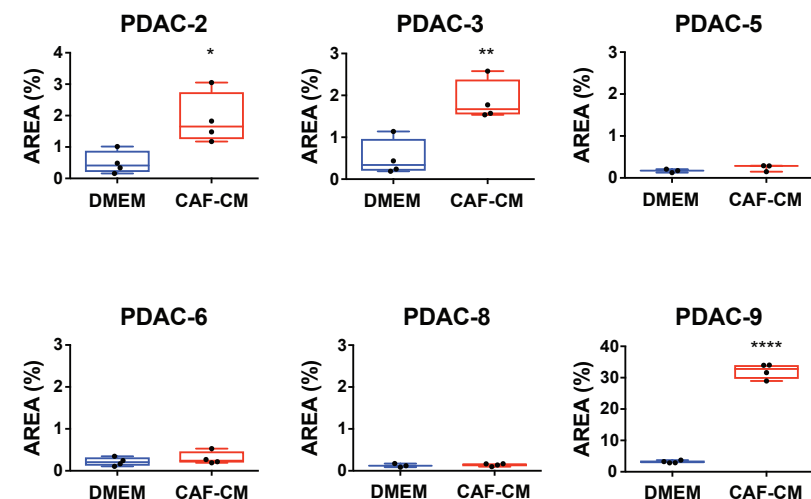

## E

PDAC-8 + CAF-1

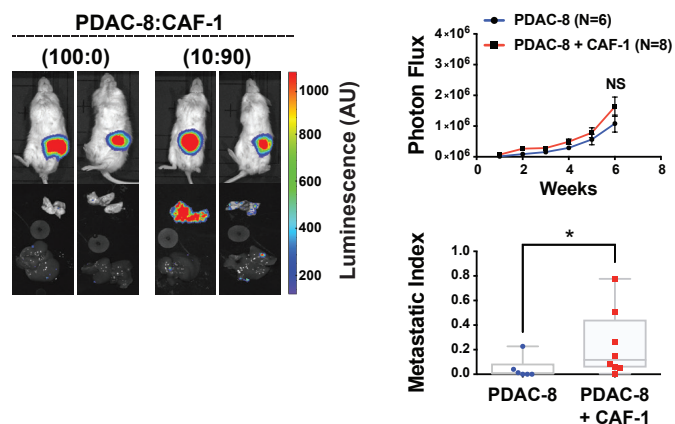

Supplement: NIHMS1530889-supplement-2.pdf [file NIHMS1530889-supplement-2.pdf]
