# Supplementary material
Source: PubMed Central journal article supplement (PMC6697165)

# Figure S4

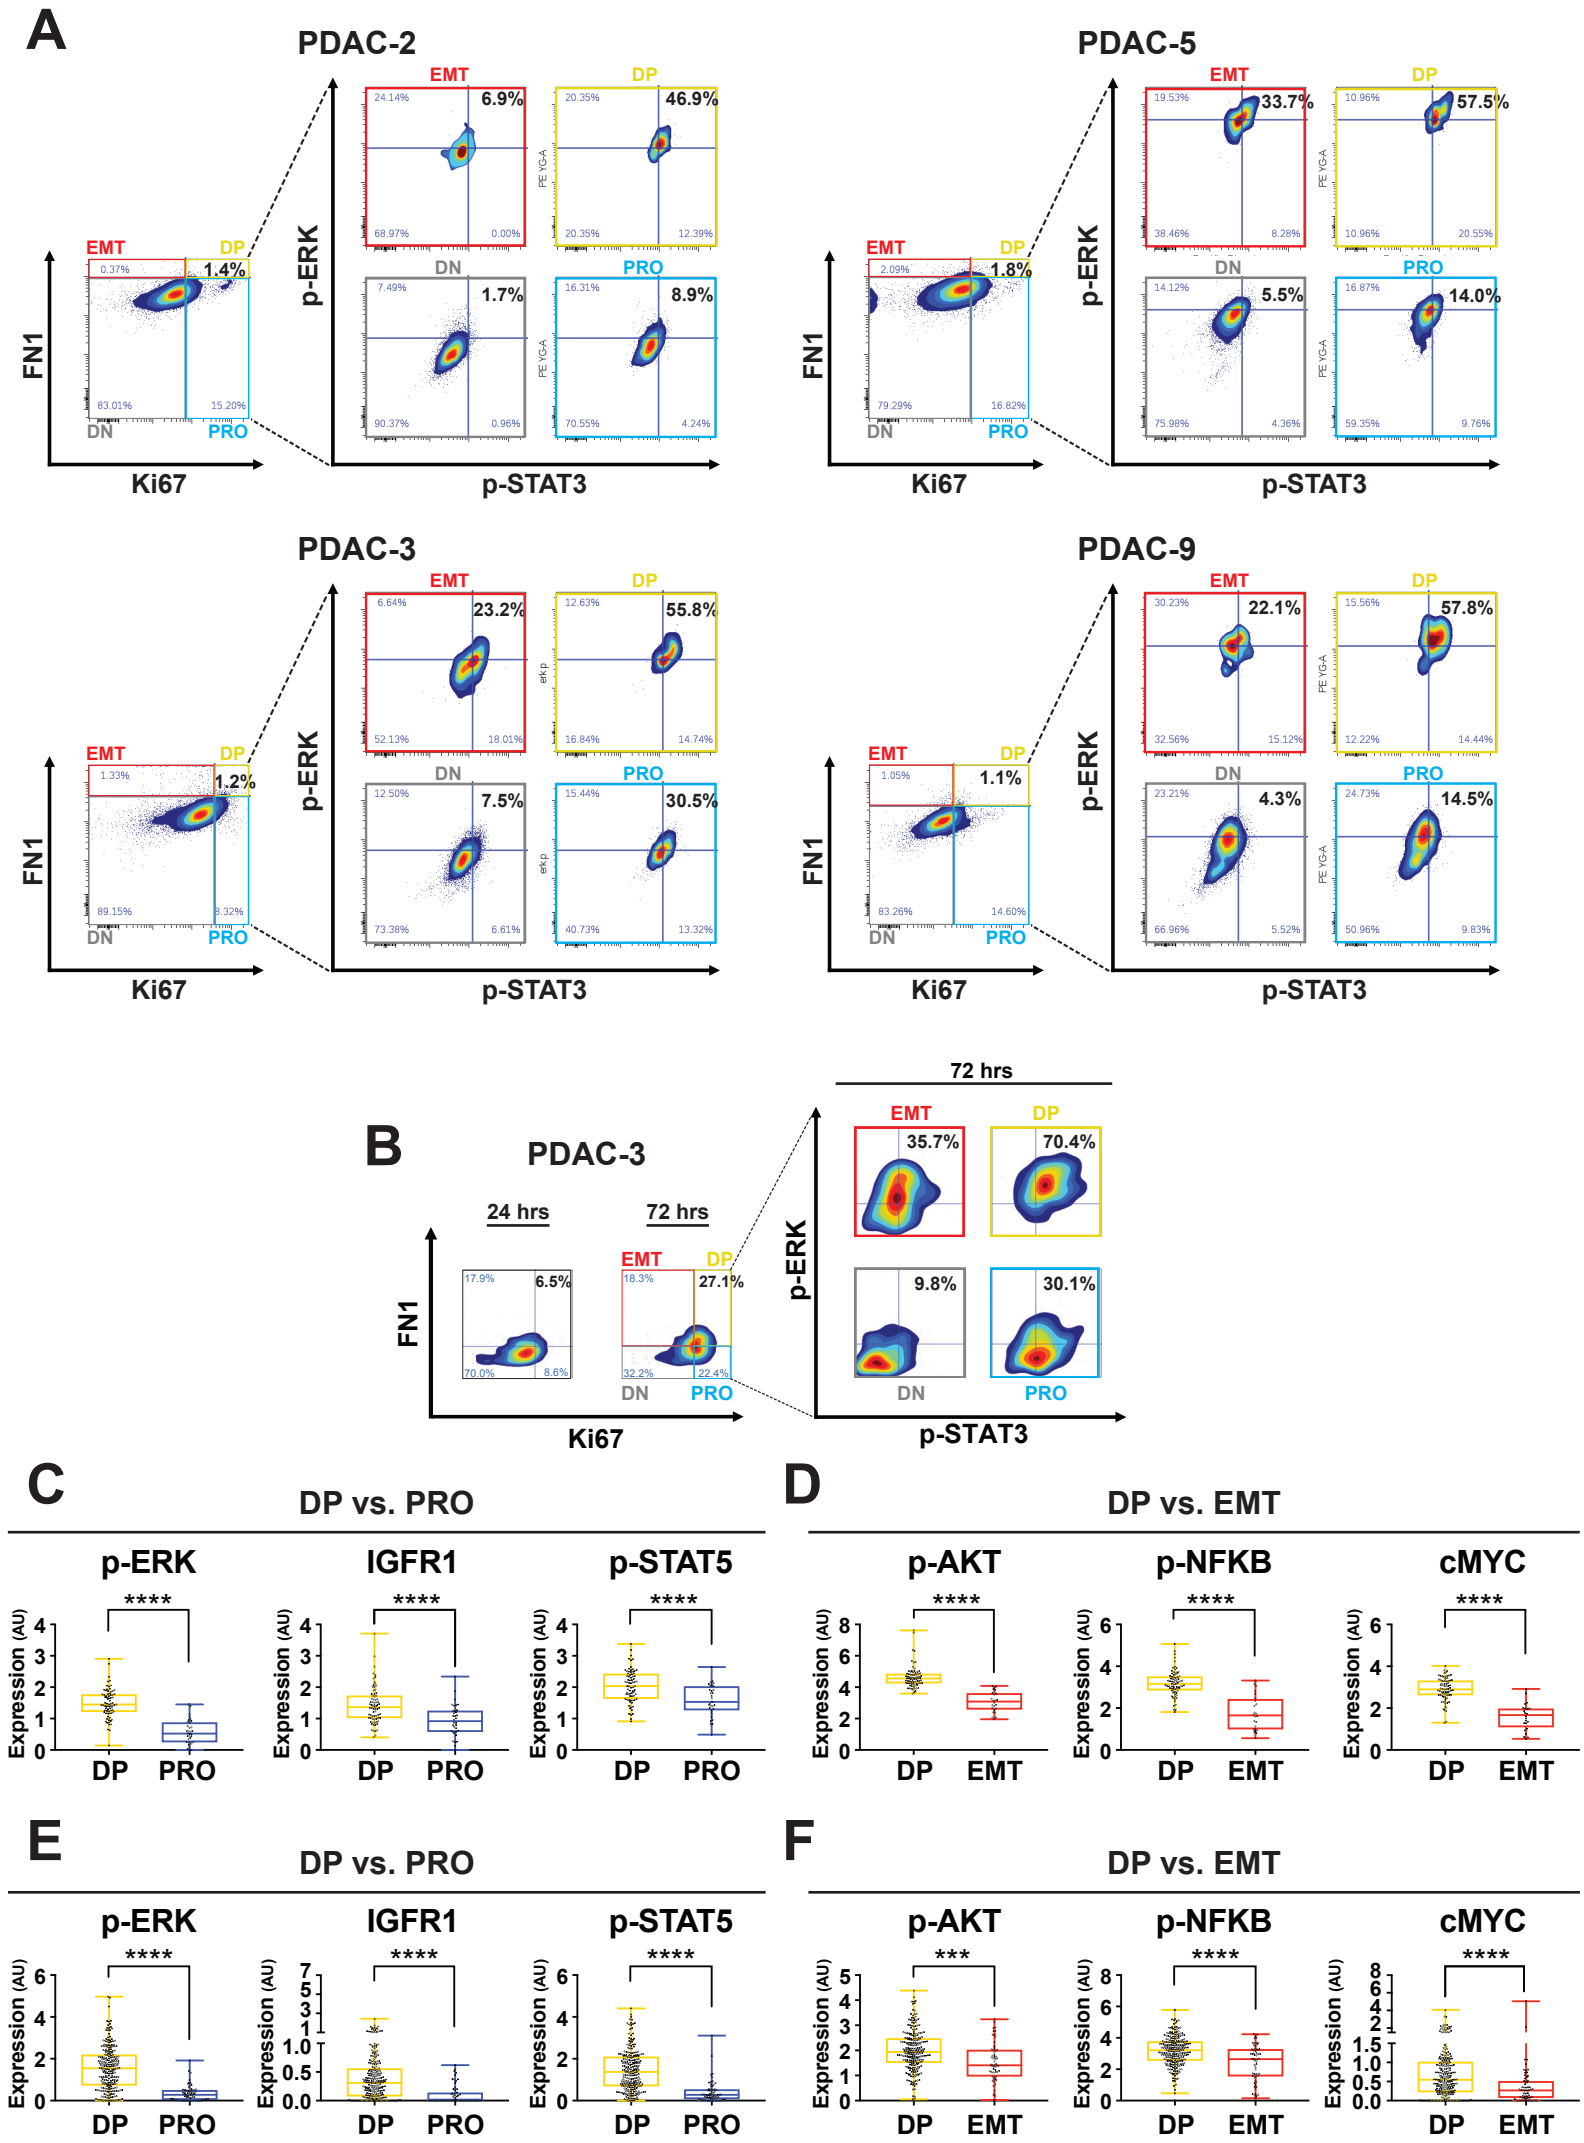

Supplement: NIHMS1530889-supplement-4.pdf [file NIHMS1530889-supplement-4.pdf]

# Figure S5

**A**

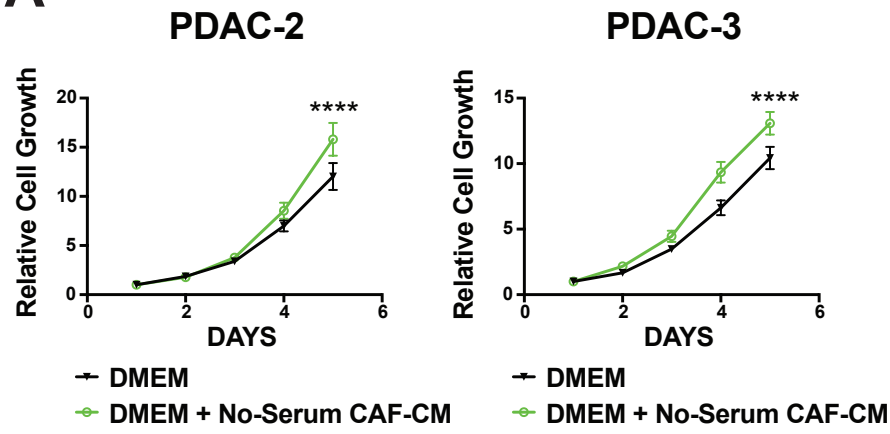

**B**

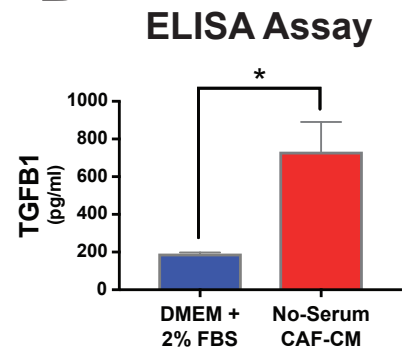

**C**

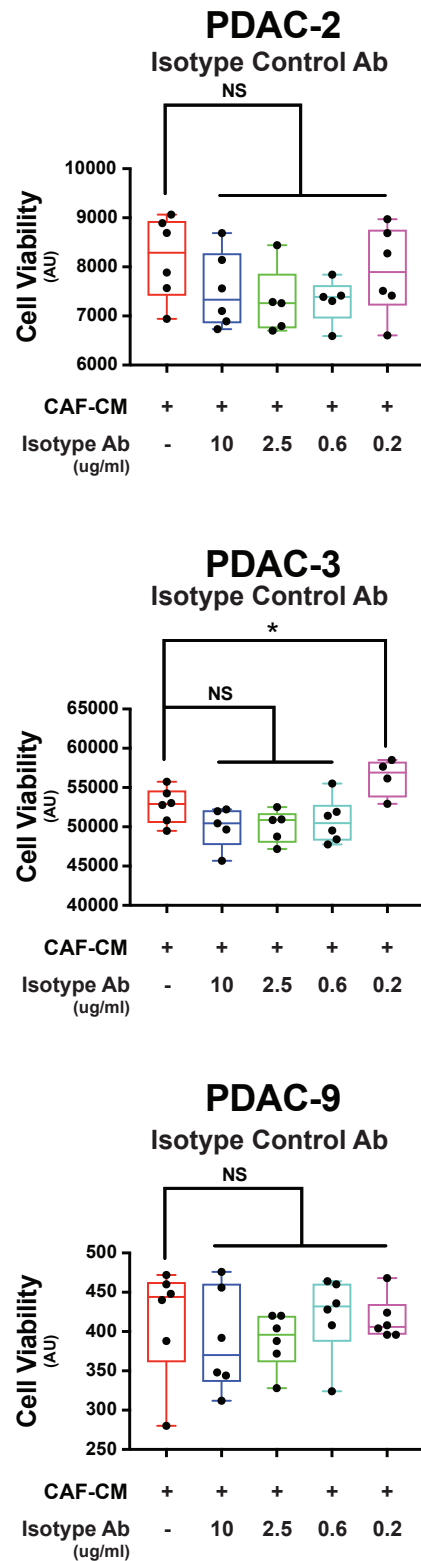

**D**

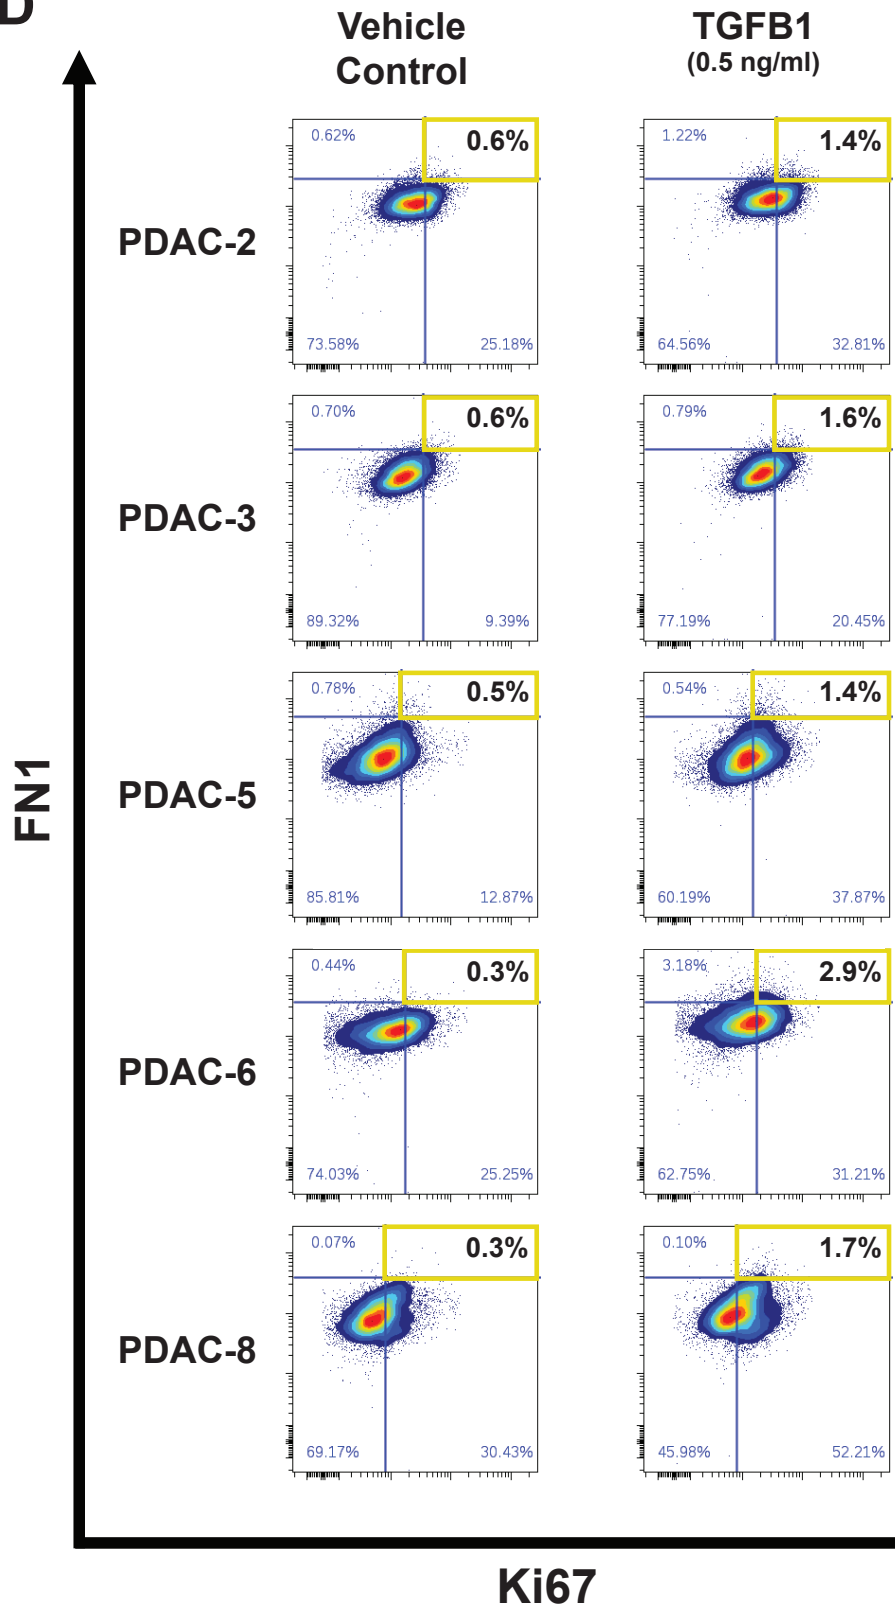

Supplement: NIHMS1530889-supplement-5.pdf [file NIHMS1530889-supplement-5.pdf]

# Figure S7

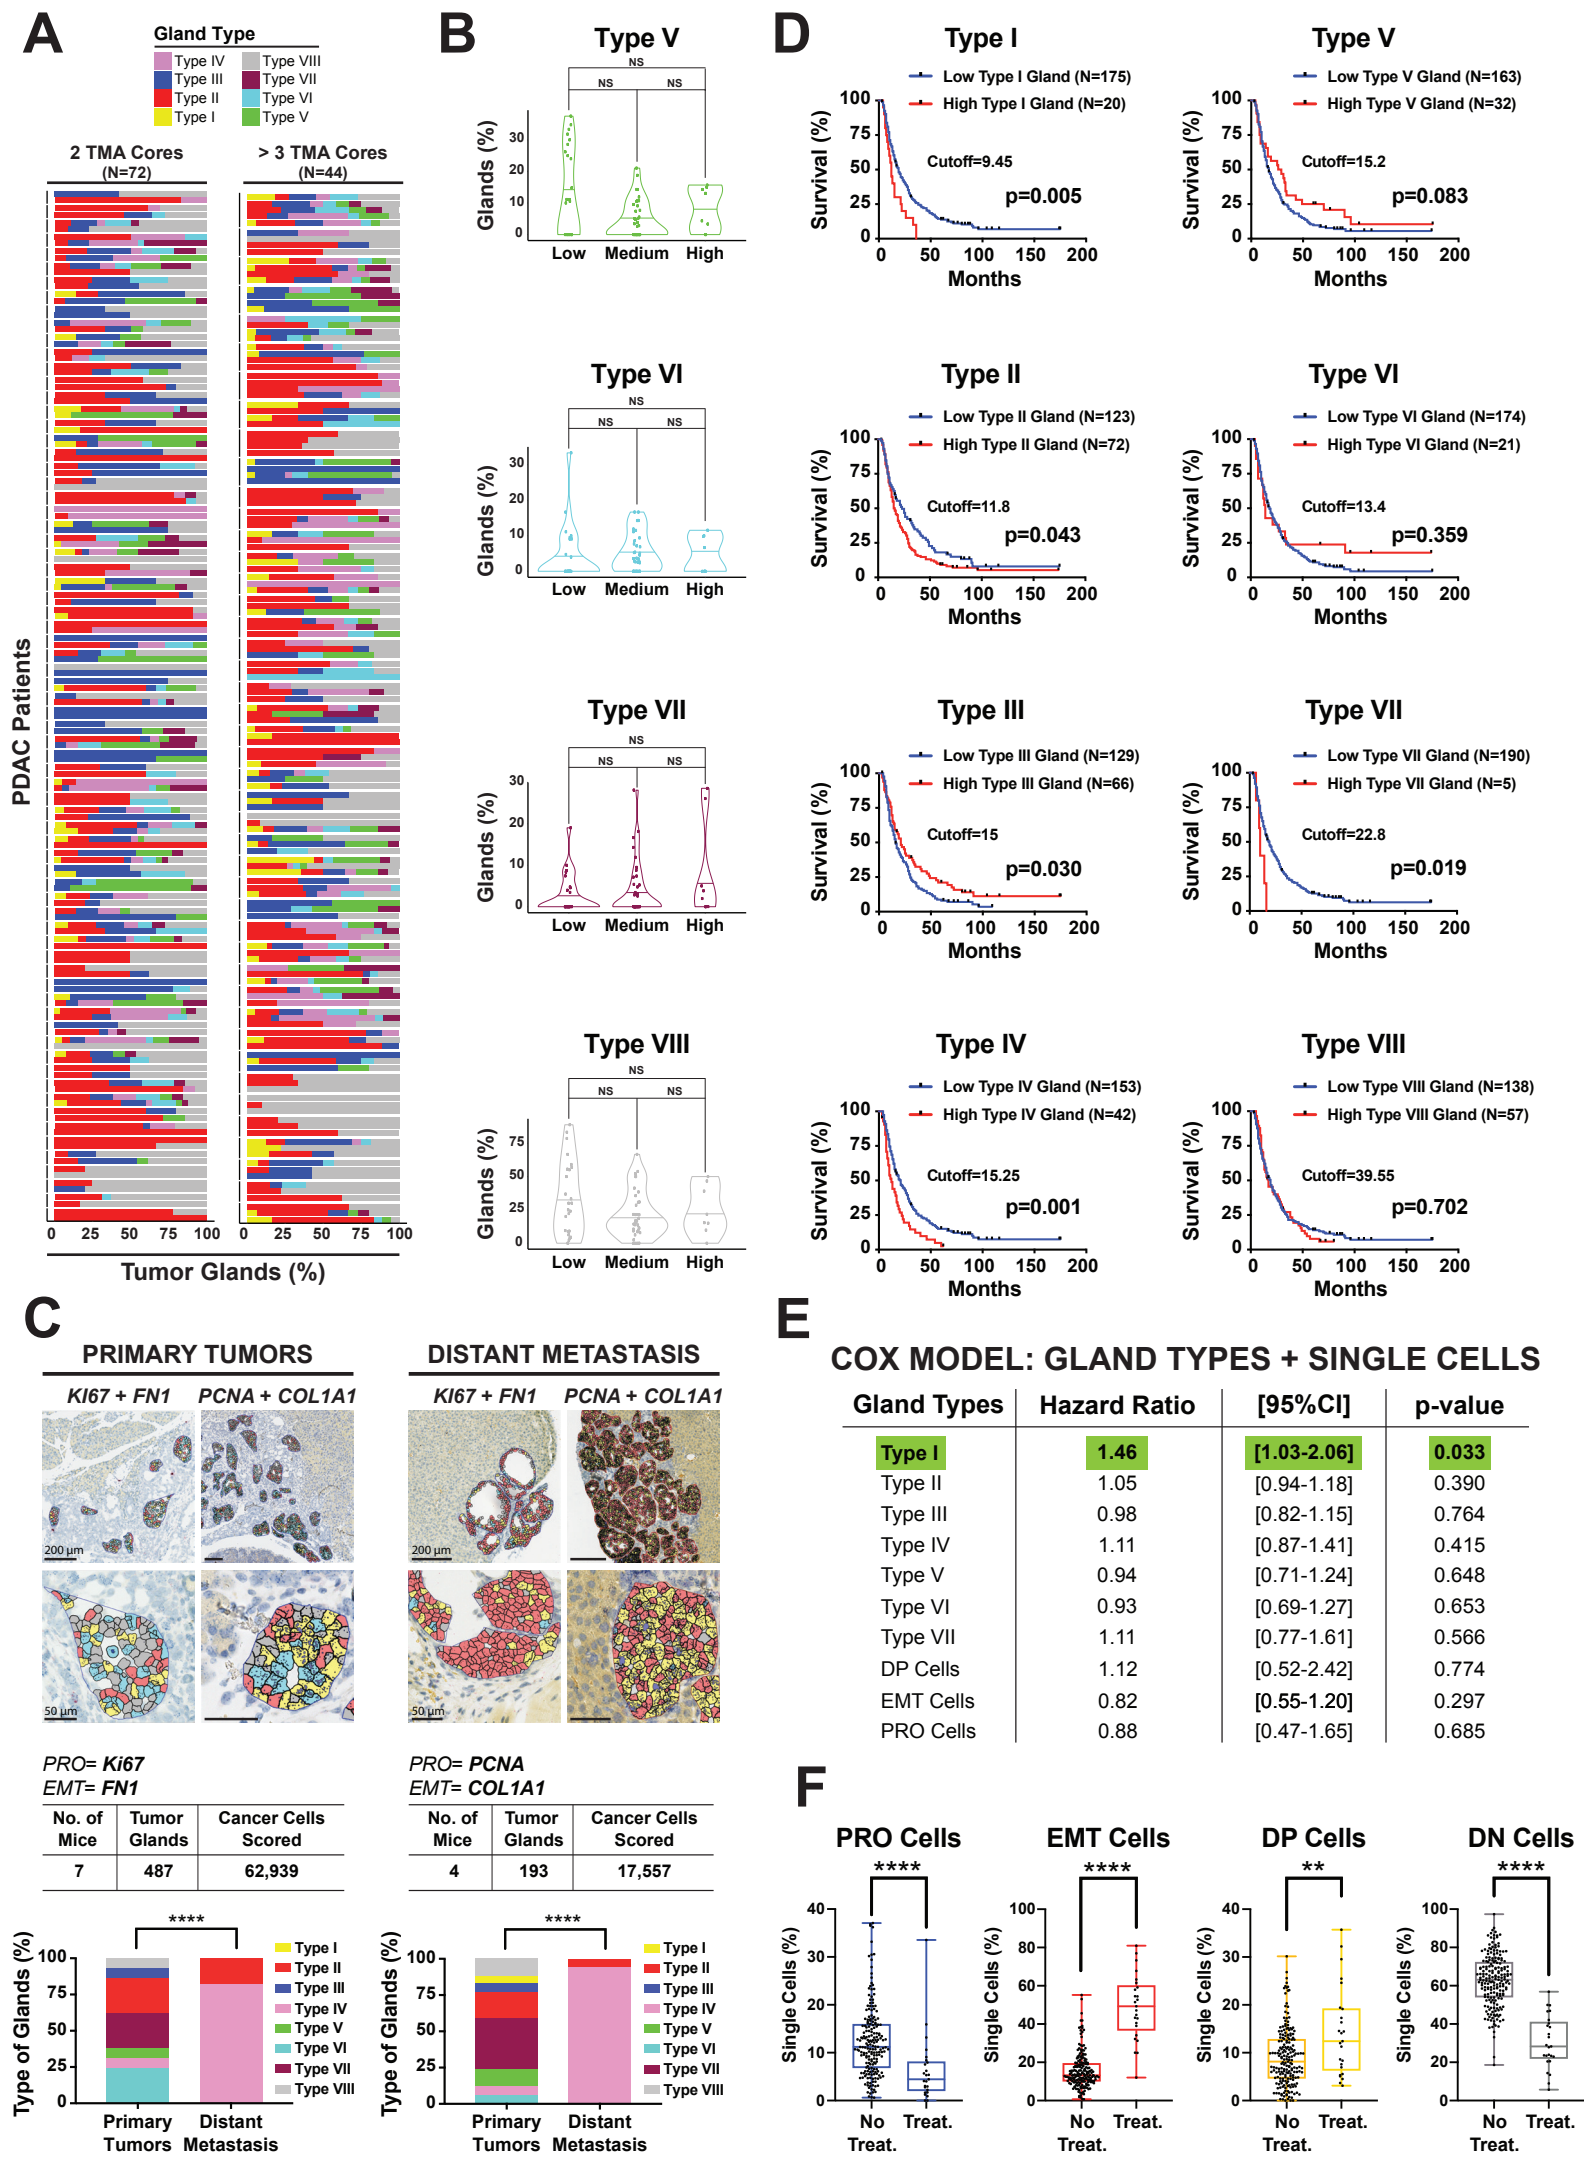

Supplement: NIHMS1530889-supplement-7.pdf [file NIHMS1530889-supplement-7.pdf]
